# Supplementary material
Source: PubMed Central journal article supplement (PMC3831679)
Supplement: pro0022-1646-SD1.pdf [file pro0022-1646-SD1.pdf]

## Engineered solubility tag for solution NMR of proteins

Amy M. Ruschak, Justine D. Rose, Michael P. Coughlin, Tomasz L. Religa

### Supporting Information

**Molecular biology.** The gene containing mutated protein A was custom synthesized by Genscript using the following E.coli codon optimized DNA sequence:

```
      |--- 6 x His ---|          |-- TEV Cleavage --||-- PA Start
      -----|-----|-----|-----|-----|-----|
1  atgcatcaccatcaccatcacgaggcctctgagaatctttattttcaggcctctgggttt 60
1  M H H H H H H E A S E N L Y F Q A S G F 20
Restriction sites:          -StuI-          -StuI-

      -----|-----|-----|-----|-----|-----|
61  aacgaagaacagcaaaaatgcctatgacgagatcgccccgctgcctaactctgaatgaggag 120
21  N E E Q Q N A Y D E I A R L P N L N E E 40

      -----|-----|-----|-----|-----|-----|
121 cagcgtaatgcctttatccaagccctgcgtgatgatccttctcaagcggctgatctgctg 180
41  Q R N A F I Q A L R D D P S Q A A D L L 60

      -----|-----|-----|-----|-----|-----|
      PA End --|
181 gcagaagcacaagccctgaacgatgcccaagcacctgggttaa 222
61  A E A Q A L N D A Q A P G * 73
```

Subsequently, it was subcloned into pET-29a vector (Novagen) between the NdeI and BamHI restriction sites. The gene for ASC CARD was synthesized by Genscript and sub-cloned into the pETM-11 vector between the NcoI and BamHI restriction sites. The D134C C173S mutations were introduced using the QuikChange (Agilent) protocol.
